# Supplementary material for: Synthesis and structure of mono-bridged resorcinarene host: a ditopic receptor for ammonium guests
Source: Royal Society of Chemistry journal article supplement (doi:10.1039/b911389d), 2009-01-01
Supplement: b911389d.pdf [file b911389d.pdf]

## Supporting Information for

# Synthesis and structure of mono-bridged resorcinarene host: Ditopic receptor for ammonium guests

Kirsi Salorinne, Tiia-Riikka Tero, Kaisa Riikonen and Maija Nissinen\*

Nanoscience Center, Department of Chemistry, University of Jyväskylä, P.O. Box 35, 40014 JYU, Finland

maija.nissinen@jyu.fi

Contents:

|                                            |    |
|--------------------------------------------|----|
| 1. Crystallographic details and data ..... | S1 |
| 2. NMR titration data and Job plot .....   | S2 |
| 3. NMR spectra of <b>1</b> .....           | S4 |

## 1. Crystallographic details and data

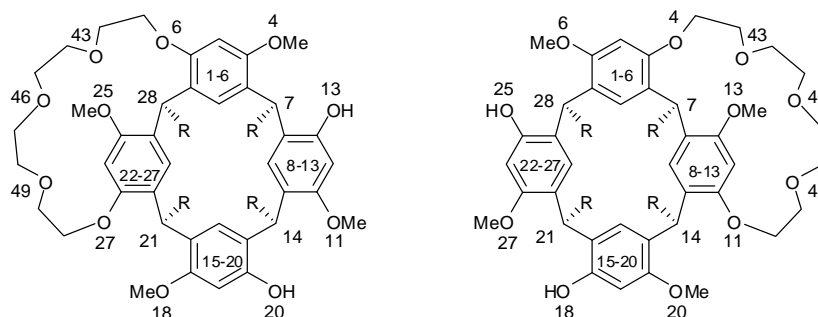

Scheme 1. Crystallographic numbering (left- and right-handed) of **1**.

Table 1. Conformational properties of **1**.

|                           | I            | II           | III          | average      |
|---------------------------|--------------|--------------|--------------|--------------|
| angle <sup>a</sup> (°)    | 26.2 / 158.1 | 36.3 / 145.2 | 33.6 / 153.1 | 32.0 / 152.1 |
| distance <sup>a</sup> (Å) | 5.58 / 7.96  | 5.78 / 7.91  | 5.87 / 7.85  | 5.74 / 7.91  |
| Crown pocket diameter (Å) | 6.13         | 6.36         | 6.28         | 6.26         |
| Contact angle (°)         | 125.7        | 119.5        | 135.5        | -            |
| Pair distance (Å)         | 4.03         | 4.69         | 7.34         | -            |

<sup>a</sup> Between the opposite aromatic ring centroids

## 2. NMR titration data and Job plot

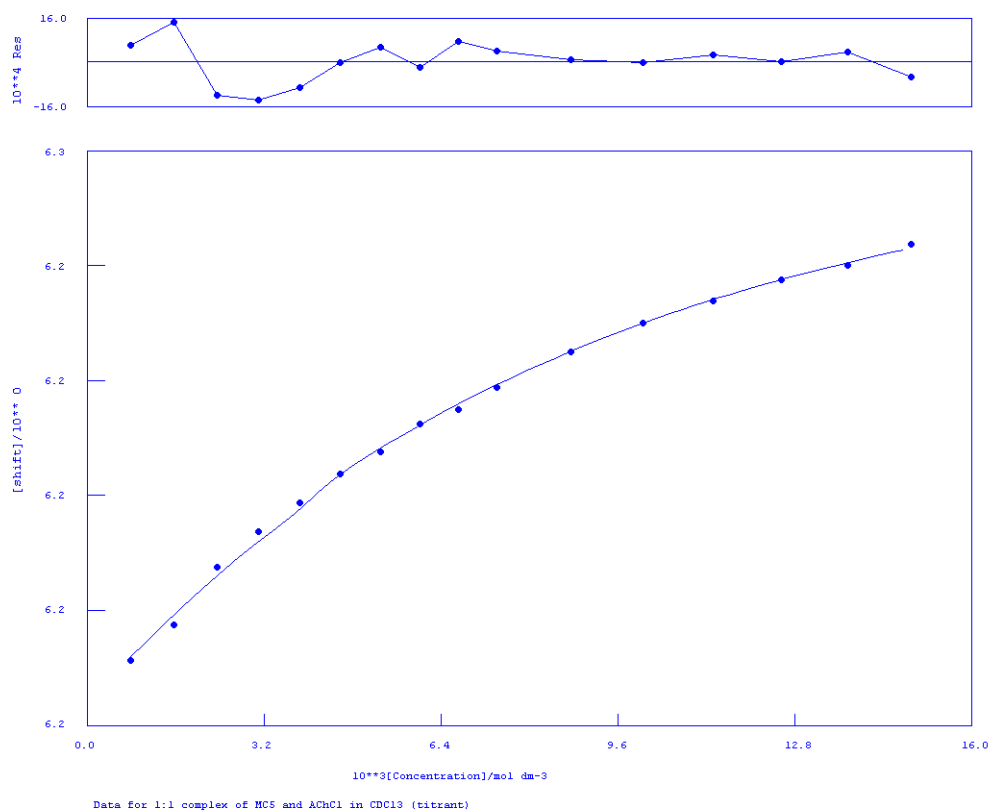

Figure 1. FitPlot of **1** and AChCl in CDCl<sub>3</sub>.

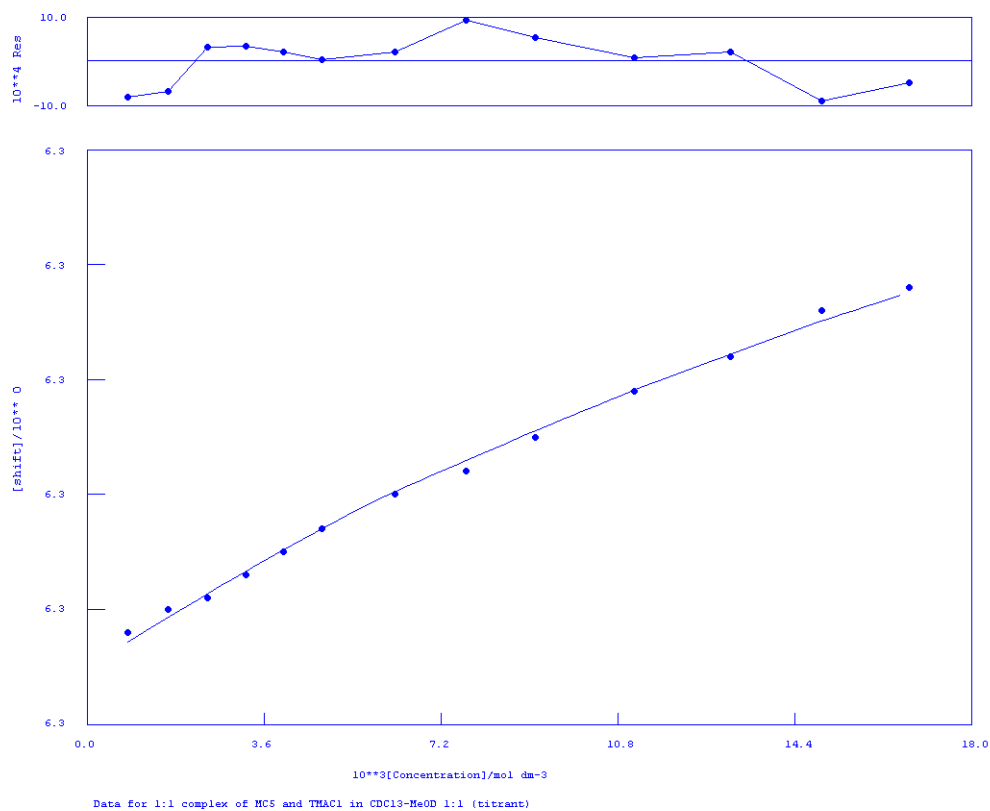

Figure 2. FitPlot of **1** and TMAcI in MeOD-CDCl<sub>3</sub> (1:1).

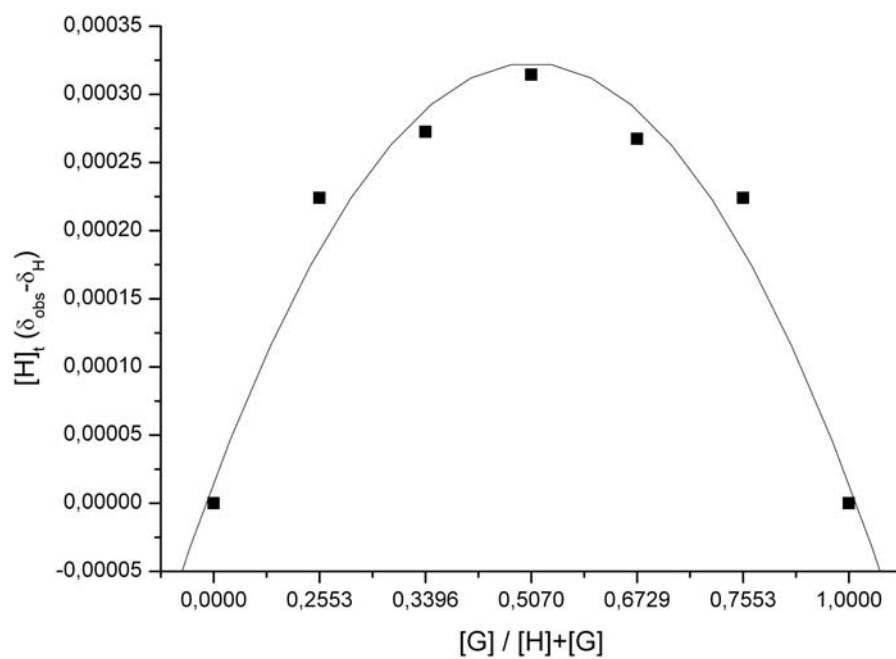

Figure 3. Job plot of **1** and AChCl in  $\text{CDCl}_3$ .

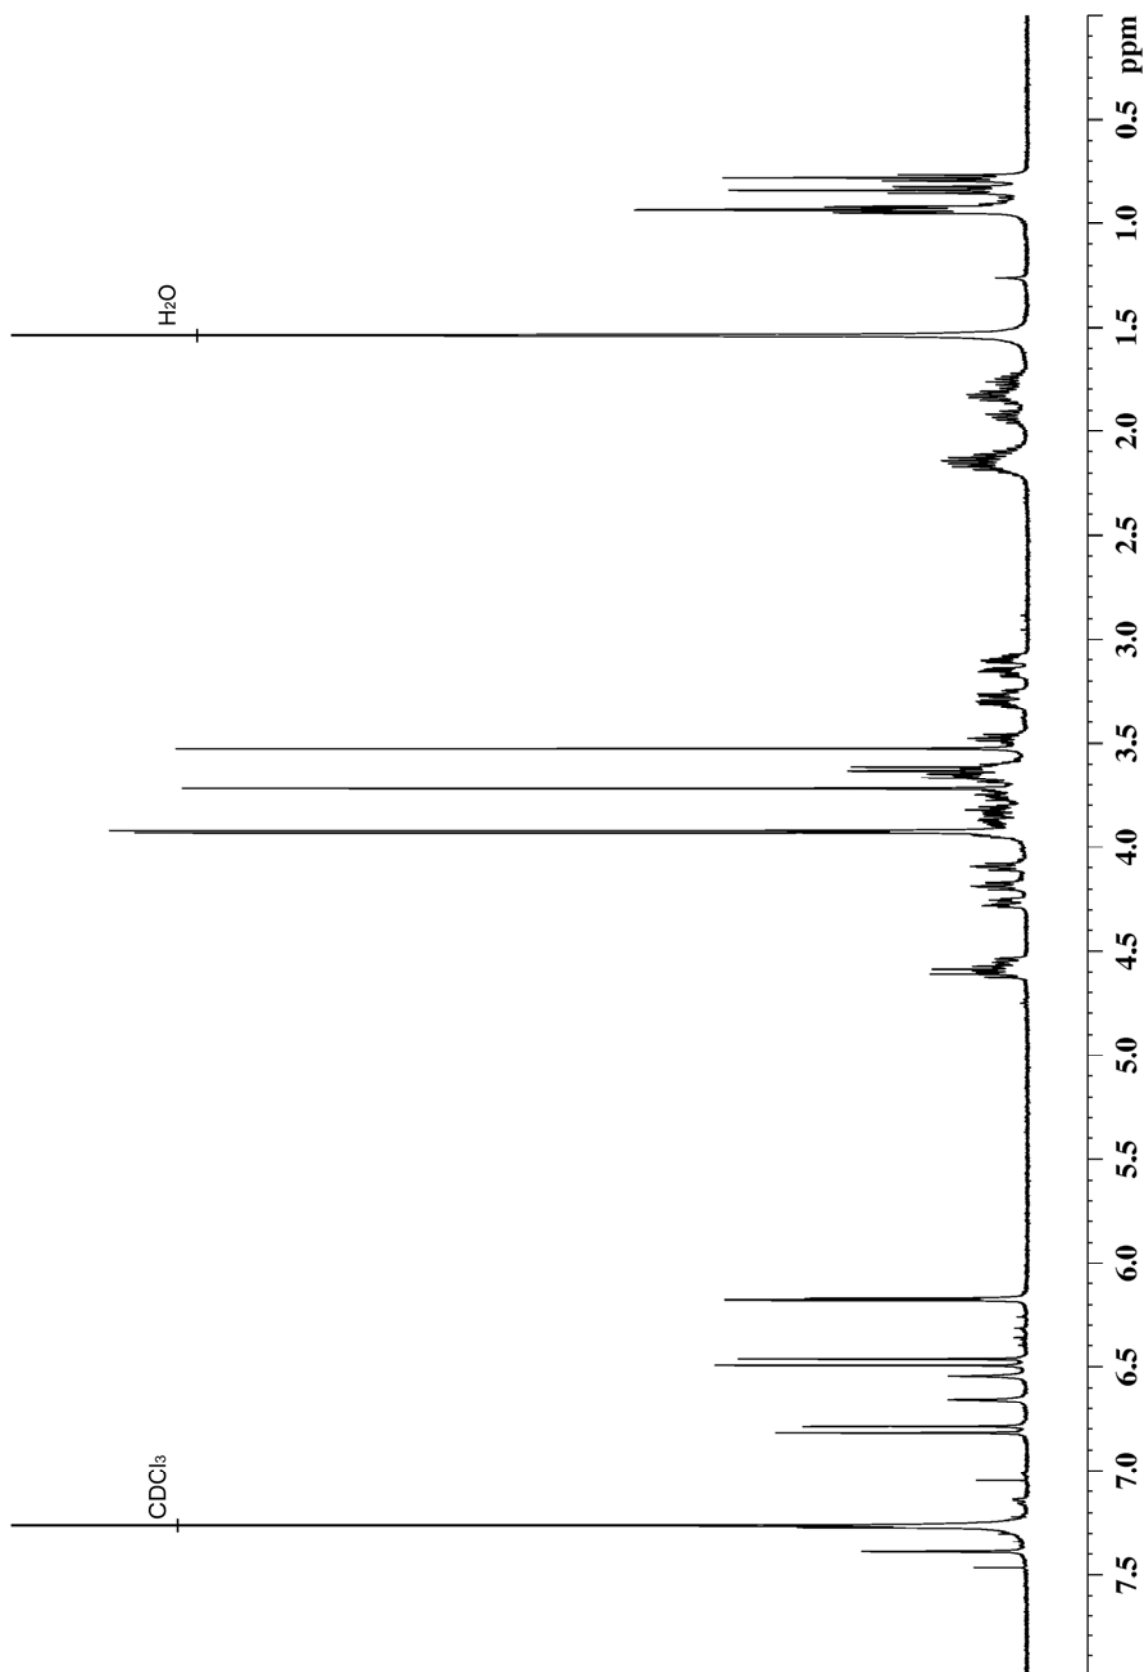

Figure 4.  $^1\text{H}$  NMR spectrum of **1** in  $\text{CDCl}_3$ .

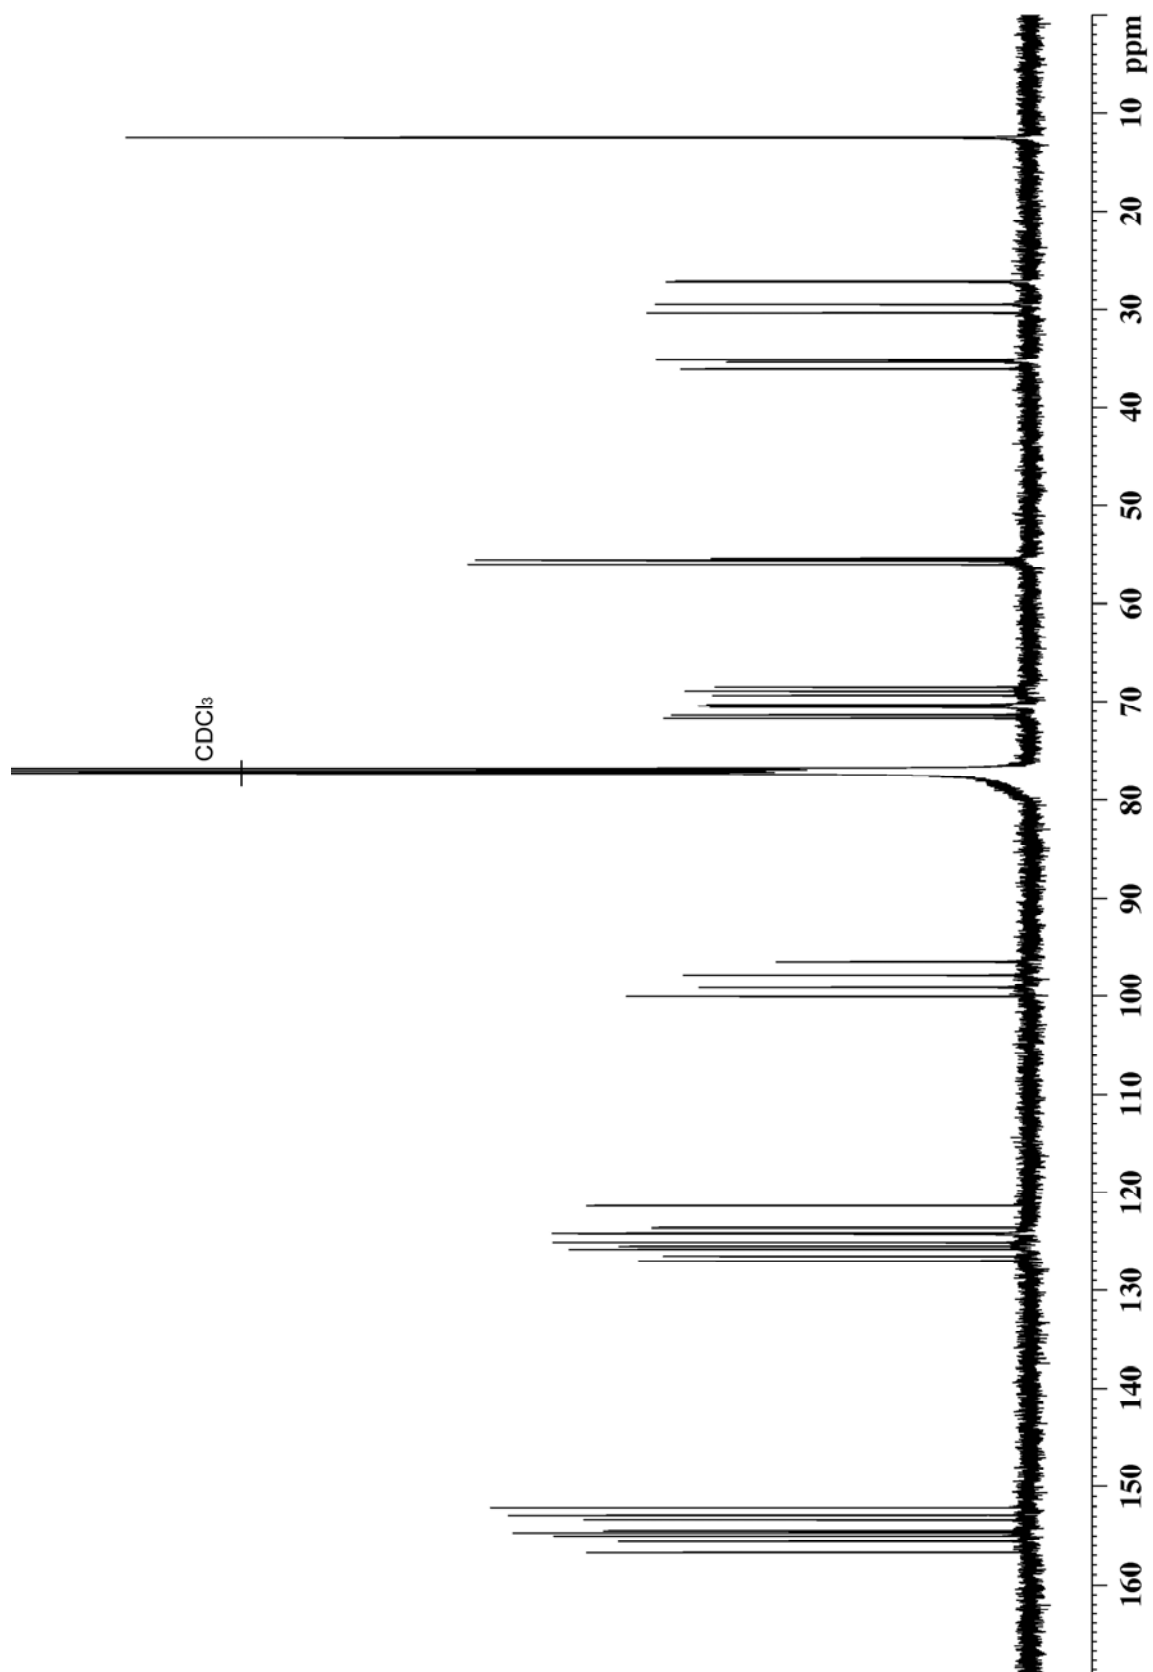

Figure 5.  $^{13}\text{C}$  NMR spectrum of **1** in  $\text{CDCl}_3$ .
